# Supplementary material for: Improved cortical surface reconstruction using sub-millimeter resolution MPRAGE by image denoising
Source: PubMed Central journal article supplement — Neuroimage. Author manuscript; Available in PMC 2021 Sep 6. (PMC8421085; doi:10.1016/j.neuroimage.2021.117946), 2021-03-10
Supplement: NIHMS1716891-supplement-1.pdf [file NIHMS1716891-supplement-1.pdf]

Improved cortical surface reconstruction using sub-millimeter resolution MPRAGE by image denoising

Qiyuan Tian<sup>1,2\*</sup>, Natalia Zaretskaya<sup>1,2,3,4</sup>, Qiuyun Fan<sup>1,2</sup>, Chanon Ngamsombat<sup>1,5</sup>,  
Berkin Bilgic<sup>1,2,6</sup>, Jonathan R. Polimeni<sup>1,2,6</sup>, Susie Y. Huang<sup>1,2,6</sup>

<sup>1</sup>Athinoula A. Martinos Center for Biomedical Imaging, Department of Radiology, Massachusetts General Hospital, Charlestown, MA, United States;

<sup>2</sup>Harvard Medical School, Boston, MA, United States;

<sup>3</sup>Institute of Psychology, University of Graz, Graz, Austria;

<sup>4</sup>BioTechMed-Graz, Austria;

<sup>5</sup>Department of Radiology, Faculty of Medicine, Siriraj Hospital, Mahidol University, Thailand;

<sup>6</sup>Harvard-MIT Division of Health Sciences and Technology, Massachusetts Institute of Technology, Cambridge, MA, United States;

\*Correspondence to: Qiyuan Tian, Ph.D., Athinoula A. Martinos Center for Biomedical Imaging, 149 13th Street, Charlestown, MA, 02129, United States. E-mail: qtian@mgh.harvard.edu.

## Supplementary Information

### Methods for 1-mm Isotropic Resolution Data

#### Data acquisition

For two subjects,  $T_1$ -weighted images at 1-mm isotropic resolution were also acquired using the MEMPRAGE sequence for comparing to surface reconstruction results from 0.6-mm isotropic resolution data. The acquisition parameter values were: TR = 2,530 ms, TE = 1.64/3.50/5.36/7.22 ms, TI = 1,200 ms, FA = 7°, 176 sagittal slices, slice thickness = 1 mm, FOV = 256 mm × 256 mm, matrix size = 256 × 256, resolution = 1 mm isotropic, echo spacing = 10.3 ms, bandwidth = 651 Hz/pixel, GRAPPA factor = 3, acquisition time = 4.5 minutes.

#### Image processing

Spatially varying intensity bias was removed using the unified segmentation routine<sup>1</sup> implementation of the SPM software. For each subject, the 1-mm isotropic resolution image volume was nonlinearly co-registered to the 6-repetition averaged image volume at 0.6-mm isotropic resolution using NiftyReg's "*reg\_aladin*" function (default parameters, spline interpolation), which was initialized with an affine transformation derived from NiftyReg's "*reg\_f3d*" function (default parameters). The non-linear co-registration slightly adjusted the image alignment locally to account for the subtle non-linear shifts of tissue in the images.

#### Surface reconstruction

Cortical surface reconstruction at 1-mm isotropic resolution was performed using the standard FreeSurfer (version v6.0) reconstruction pipeline ("*recon-all*" function with default parameters).

#### Surface accuracy comparison

For comparing gray–white and gray–CSF surfaces reconstructed from 1-mm and 0.6-mm isotropic resolution data, the triangular surface meshes generated from 1-mm isotropic resolution data were

resampled onto the corresponding triangular surface meshes generated from the 6-repetition averaged 0.6-mm isotropic resolution data to establish vertex correspondence following the previous study<sup>2</sup>. The vertex-wise displacement of the gray–white and gray–CSF surfaces and the difference of the cortical thickness estimates were then calculated. The FreeSurfer longitudinal pipeline cannot be used for this comparison because the number of vertices of triangular surface meshes generated from 1-mm and 0.6-mm isotropic resolution data is substantially different (~0.5 million vs. ~1 million).

### References

1. Ashburner J, Friston KJ. Unified segmentation. *NeuroImage*. 2005;26(3):839-851.
2. Zaretskaya N, Fischl B, Reuter M, Renvall V, Polimeni JR. Advantages of cortical surface reconstruction using submillimeter 7 T MEMPRAGE. *NeuroImage*. 2018;165:11-26.

## Supplementary Figures and Tables

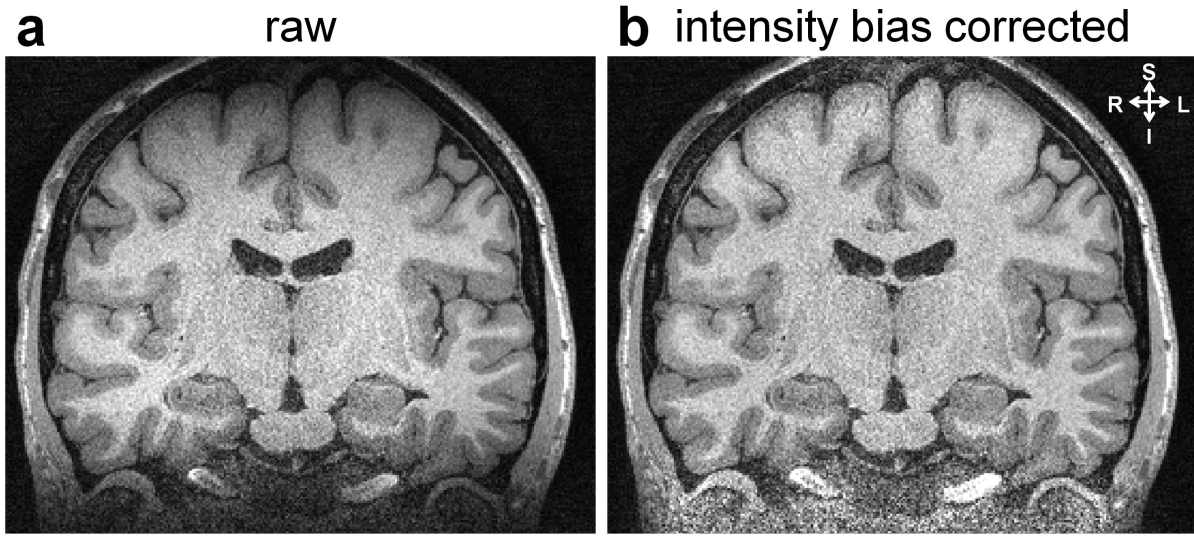

**Supplementary Figure 1. Intensity bias correction.** A representative coronal image slice from the raw data acquired using a slab-selective oblique-axial acquisition (a) and the same image slice corrected for the spatially varying intensity bias induced by the  $B_1$  field inhomogeneity (b).

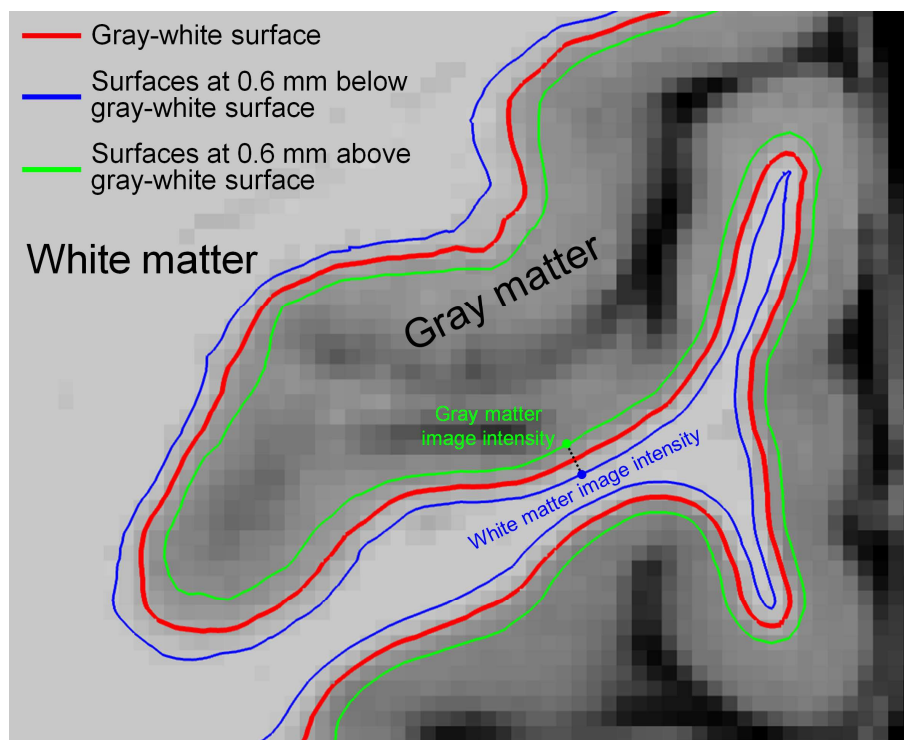

**Supplementary Figure 2. Sampling surfaces.** Cross-sections of the gray–white surface (red) and the surfaces at 0.6 mm below (blue) and above (green) the gray–white surface for sampling the white matter and gray matter image intensities (blue and green dots) to calculate the gray–white contrast. The surfaces are from the 6-repetition averaged data of a representative subject.



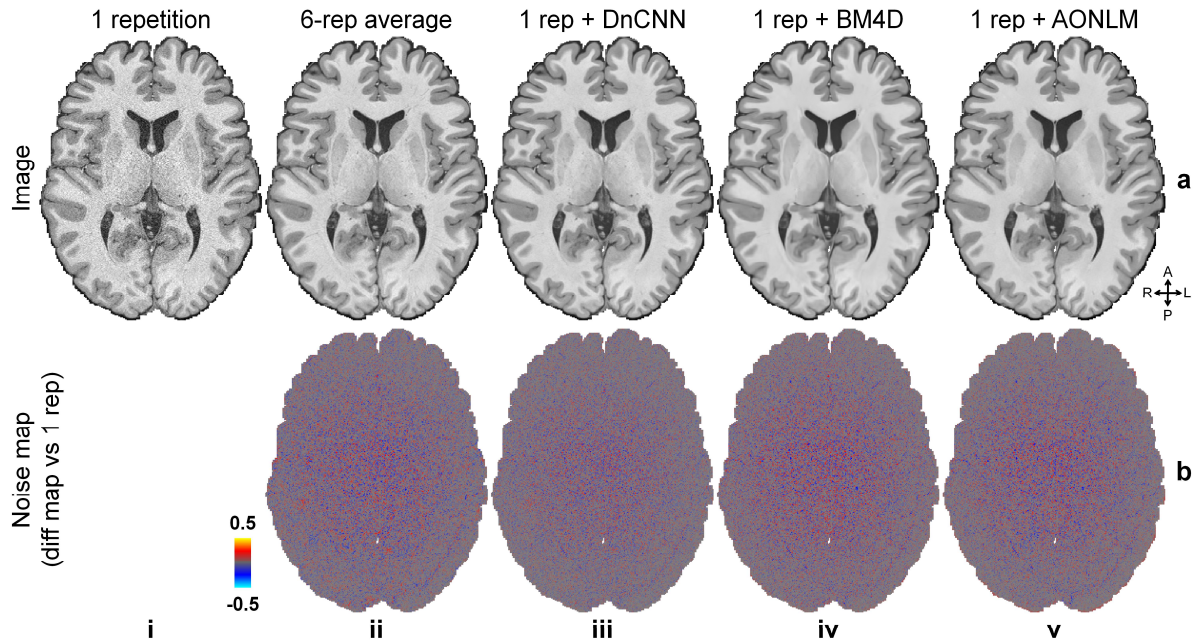

**Supplementary Figure 3. Noise estimation.** A representative axial image slice from the single-repetition data (a, i), the 6-repetition averaged data (a, ii), and the single-repetition data denoised by DnCNN (a, iii), BM4D (a, iv) and AONLM (a, v), and their residuals (i.e., estimated noise) compared to the image from the single-repetition data (rows a, i).

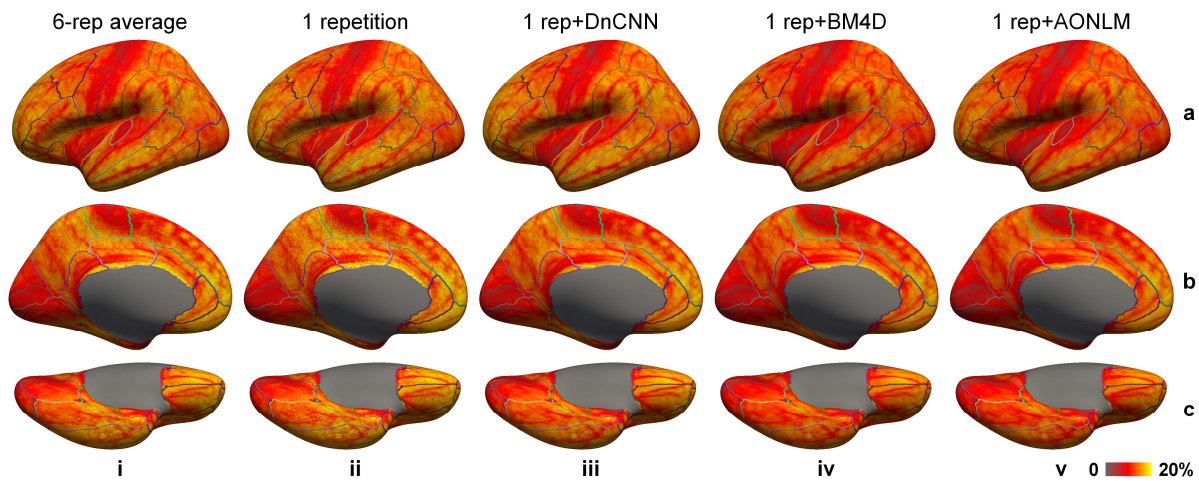

**Supplementary Figure 4. Averaged gray–white contrast.** Left-hemispheric vertex-wise contrast between the gray matter and white matter image intensity (expressed as  $[white - gray]/[white + gray] \cdot 100\%$ ) from the 6-repetition averaged data (column i), single-repetition data (column ii), single-repetition data denoised by DnCNN (column iii), BM4D (column iv) and AONLM (column v) averaged across 30 image volumes from the 5 evaluation subjects, displayed on inflated surface representations. Different cortical regions from the FreeSurfer cortical parcellation (i.e., *aparc.annot*) are depicted as colored outlines.

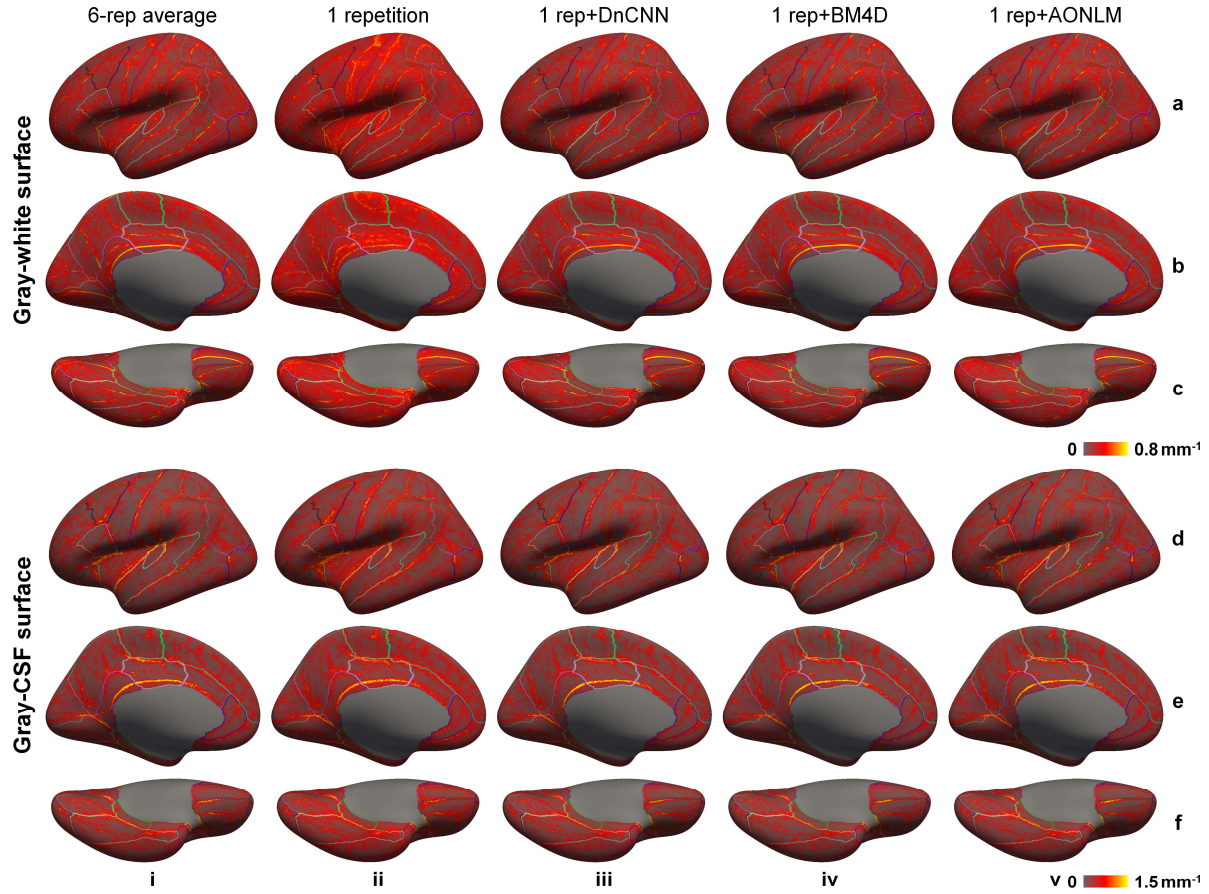

**Supplementary Figure 5. Averaged cortical surface smoothness.** Left-hemispheric vertex-wise mean curvature of the reconstructed gray–white surfaces (a–c) and gray–CSF surfaces (d–f) from the 6-repetition averaged data (column i), single-repetition data (column ii), single-repetition data denoised by DnCNN (column iii), BM4D (column iv) and AONLM (column v) averaged across 30 image volumes from the 5 evaluation subjects, displayed on inflated surface representations. Different cortical regions from the FreeSurfer cortical parcellation (i.e., *aparc.annot*) are depicted as colored outlines.



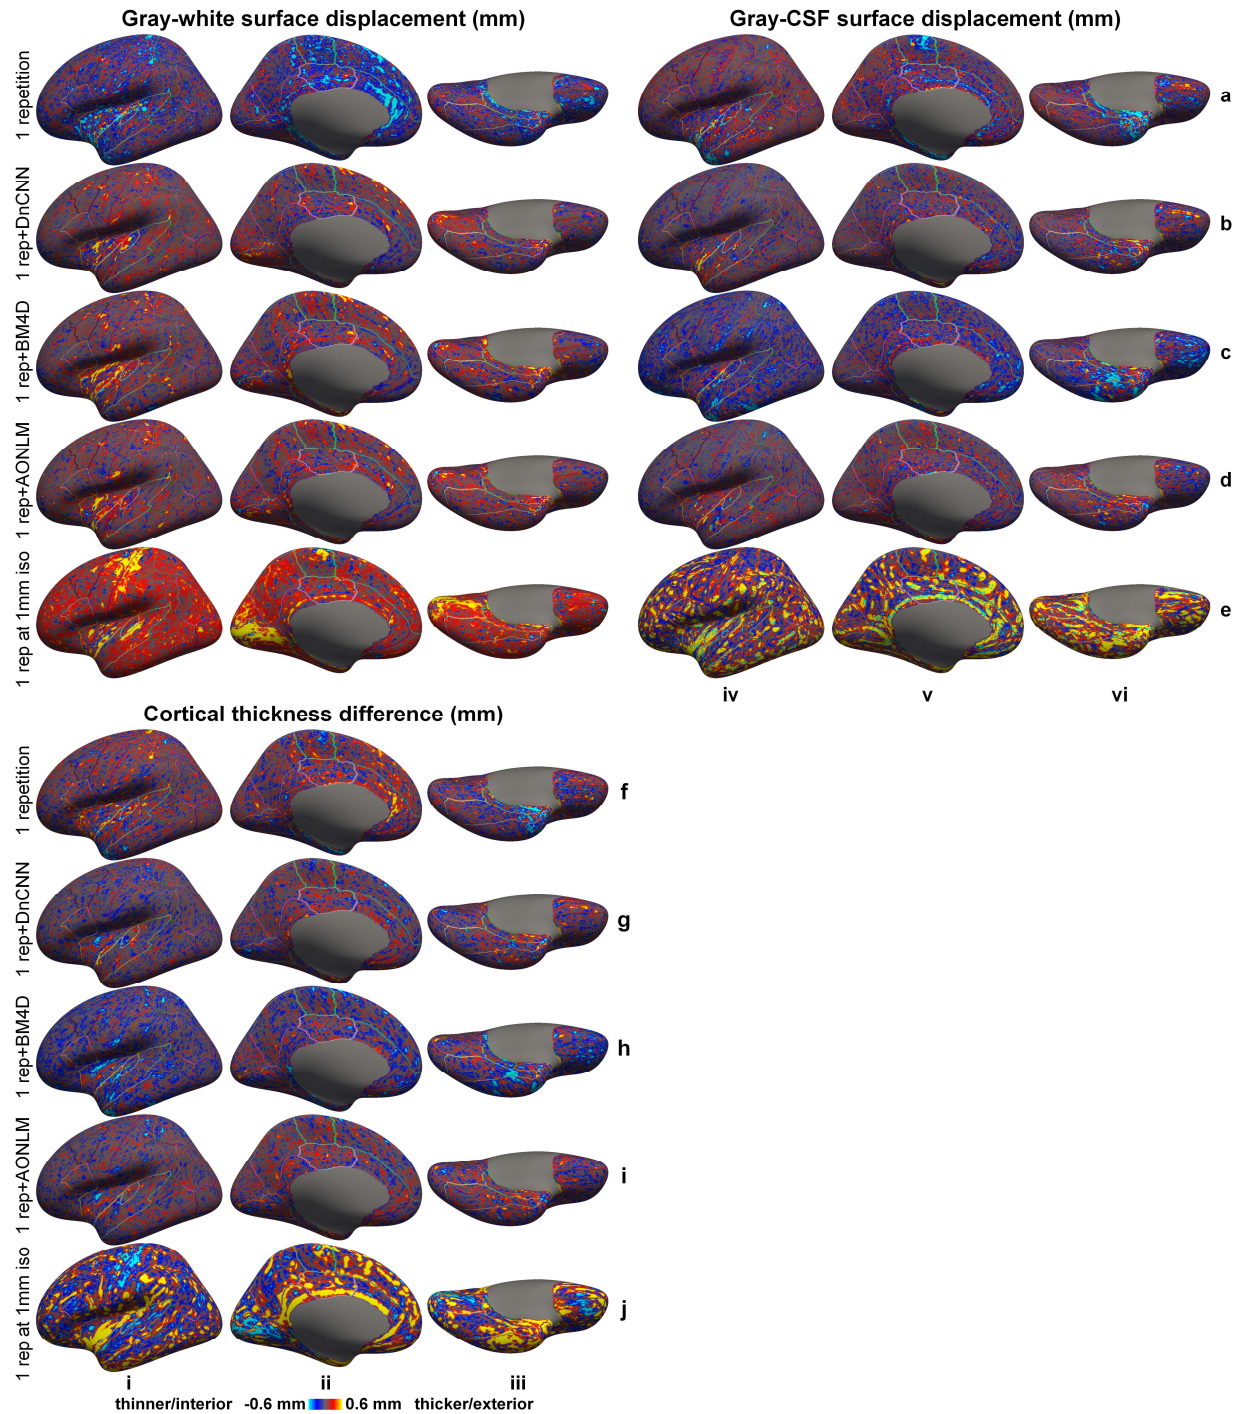

**Supplementary Figure 6. Positioning and thickness accuracy.** Left-hemispheric vertex-wise displacement/difference of the gray–white surfaces (rows a–e, column i–iii) and gray–CSF surfaces (rows a–e, column iv–vi) and cortical thickness estimates (rows f–j, column i–iii) from the single-repetition data (rows a, f) and the single-repetition data denoised by DnCNN (rows b, g), BM4D (rows c, h) and AONLM (rows d, i) at 0.6-mm isotropic resolution, and the single-repetition data at 1-mm isotropic resolution (rows e, j) compared to the surfaces estimated from the 6-repetition averaged data of a representative subject, displayed on inflated surface representations. Different cortical regions from the FreeSurfer cortical parcellation (i.e., *aparc.annot*) are depicted as colored outlines.

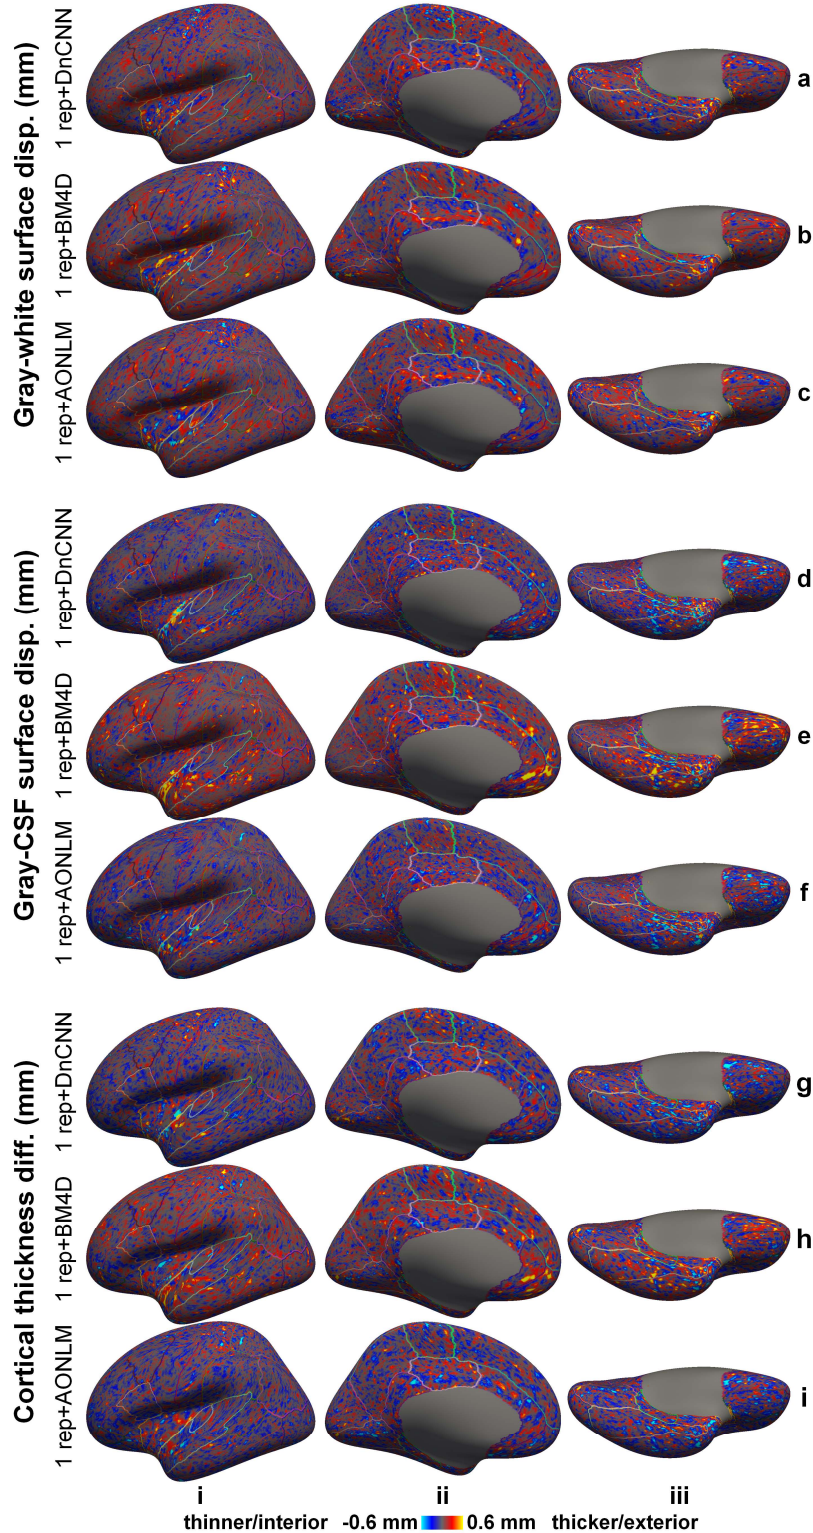

**Supplementary Figure 7. Positioning and thickness precision.** Left-hemispheric vertex-wise displacement/difference of the gray–white surfaces (rows a–c) and gray–CSF surfaces (rows d–f) and cortical thickness estimates (rows g–i) from two consecutively acquired single-repetition data denoised by DnCNN (rows a, d, g), BM4D (rows b, e, h) and AONLM (rows c, f, i) of a representative subject, displayed on inflated surface representations. Different cortical regions from the FreeSurfer cortical parcellation (i.e., *aparc.annot*) are depicted as colored outlines.

| Gray-white surface displacement (mm) compared to ground truth from 6-repetition averaged data |                            |                |                |                  |                  |                  |                 |                |                |
|-----------------------------------------------------------------------------------------------|----------------------------|----------------|----------------|------------------|------------------|------------------|-----------------|----------------|----------------|
| #                                                                                             | Cortices                   | 1 repetition   | 2 repetitions  | 3 repetitions    | 4 repetitions    | 5 repetitions    | 1 rep + DnCNN   | 1 rep + BM4D   | 1 rep + AONLM  |
| 1                                                                                             | Superior frontal           | 0.2724±0.0536  | 0.1692±0.03157 | 0.129±0.01805    | 0.1082±0.01406   | 0.09206±0.01484  | 0.1485±0.02164  | 0.168±0.02684  | 0.1669±0.02786 |
| 2                                                                                             | Rostral middle frontal     | 0.1977±0.07068 | 0.1252±0.03976 | 0.09743±0.02443  | 0.0831±0.02133   | 0.07218±0.02121  | 0.1172±0.02972  | 0.1311±0.03322 | 0.1271±0.03226 |
| 3                                                                                             | Caudal middle frontal      | 0.2647±0.06135 | 0.1636±0.03242 | 0.1211±0.01899   | 0.09885±0.01269  | 0.08617±0.01592  | 0.1397±0.01954  | 0.1533±0.02307 | 0.1531±0.02558 |
| 4                                                                                             | Pars opercularis           | 0.2544±0.07431 | 0.1517±0.03902 | 0.11±0.02165     | 0.09073±0.01774  | 0.077±0.01745    | 0.1235±0.02539  | 0.1353±0.02765 | 0.1352±0.02928 |
| 5                                                                                             | Pars triangularis          | 0.2372±0.1074  | 0.1502±0.06582 | 0.1069±0.03371   | 0.08975±0.02797  | 0.07695±0.02918  | 0.1206±0.03325  | 0.133±0.03641  | 0.1302±0.03755 |
| 6                                                                                             | Pars orbitalis             | 0.2248±0.08882 | 0.1518±0.05481 | 0.1165±0.0354    | 0.09857±0.03102  | 0.08235±0.02642  | 0.1425±0.04126  | 0.1535±0.04307 | 0.1489±0.04144 |
| 7                                                                                             | Lateral orbitofrontal      | 0.2732±0.06782 | 0.1841±0.04273 | 0.1381±0.02464   | 0.1175±0.02447   | 0.09621±0.01819  | 0.1544±0.03255  | 0.1691±0.03208 | 0.1717±0.03445 |
| 8                                                                                             | Medial orbitofrontal       | 0.2302±0.0599  | 0.1605±0.03942 | 0.13±0.0301      | 0.1101±0.02623   | 0.09281±0.02129  | 0.1492±0.03357  | 0.157±0.03212  | 0.1587±0.03261 |
| 9                                                                                             | Precentral                 | 0.234±0.05801  | 0.2106±0.0352  | 0.1655±0.02341   | 0.1374±0.01881   | 0.1204±0.0205    | 0.1835±0.03179  | 0.2068±0.04857 | 0.2135±0.0479  |
| 10                                                                                            | Paracentral                | 0.3474±0.05652 | 0.2146±0.03067 | 0.1687±0.02053   | 0.1419±0.01826   | 0.1231±0.02151   | 0.1905±0.02711  | 0.2162±0.05089 | 0.2287±0.05571 |
| 11                                                                                            | Frontal pole               | 0.2304±0.0875  | 0.1612±0.05737 | 0.1396±0.04845   | 0.1154±0.03685   | 0.107±0.04082    | 0.1659±0.06649  | 0.194±0.07748  | 0.1794±0.07227 |
| 12                                                                                            | Superior parietal          | 0.2165±0.04414 | 0.1303±0.01554 | 0.1018±0.009543  | 0.08448±0.006521 | 0.07332±0.009185 | 0.1235±0.01562  | 0.1387±0.02022 | 0.1396±0.01839 |
| 13                                                                                            | Inferior parietal          | 0.183±0.03884  | 0.1148±0.01074 | 0.09062±0.006357 | 0.07635±0.005439 | 0.06773±0.008305 | 0.1125±0.01452  | 0.1255±0.0205  | 0.1232±0.0188  |
| 14                                                                                            | Supramarginal              | 0.1982±0.0372  | 0.1247±0.02024 | 0.09831±0.01181  | 0.08271±0.01015  | 0.07243±0.01124  | 0.1194±0.01627  | 0.1315±0.02106 | 0.1294±0.02088 |
| 15                                                                                            | Postcentral                | 0.2642±0.04854 | 0.1696±0.03413 | 0.1317±0.0239    | 0.1108±0.02018   | 0.09446±0.01912  | 0.1592±0.02723  | 0.1811±0.03708 | 0.1821±0.03282 |
| 16                                                                                            | Precuneus                  | 0.2193±0.04294 | 0.1307±0.01409 | 0.1022±0.008607  | 0.0828±0.005642  | 0.07241±0.008587 | 0.1215±0.01296  | 0.1371±0.01762 | 0.1411±0.01781 |
| 17                                                                                            | Superior temporal          | 0.2593±0.03898 | 0.1726±0.02397 | 0.1315±0.01443   | 0.1144±0.01525   | 0.09869±0.01894  | 0.1555±0.01925  | 0.1662±0.0186  | 0.1665±0.01921 |
| 18                                                                                            | Middle temporal            | 0.2215±0.03958 | 0.144±0.02022  | 0.111±0.01282    | 0.09557±0.01214  | 0.08252±0.0128   | 0.1375±0.0191   | 0.1496±0.02422 | 0.1473±0.02215 |
| 19                                                                                            | Inferior temporal          | 0.2412±0.04746 | 0.1554±0.02683 | 0.122±0.01598    | 0.1045±0.01665   | 0.08684±0.01378  | 0.1526±0.02744  | 0.1618±0.02542 | 0.1643±0.02768 |
| 20                                                                                            | Banks of sup temp sulcus   | 0.1894±0.03193 | 0.1153±0.0147  | 0.08612±0.005842 | 0.07122±0.005444 | 0.05917±0.006335 | 0.09891±0.01159 | 0.1115±0.01577 | 0.1099±0.01658 |
| 21                                                                                            | Fusiform                   | 0.2463±0.05098 | 0.1546±0.03042 | 0.1196±0.01901   | 0.09856±0.014    | 0.08318±0.01684  | 0.1451±0.02223  | 0.1566±0.0217  | 0.1619±0.02429 |
| 22                                                                                            | Transverse temporal        | 0.3646±0.07071 | 0.2309±0.05088 | 0.1799±0.03548   | 0.1396±0.03033   | 0.1224±0.02988   | 0.204±0.0425    | 0.2192±0.05211 | 0.2423±0.04297 |
| 23                                                                                            | Entorhinal                 | 0.3434±0.06467 | 0.2577±0.08661 | 0.2046±0.04682   | 0.1725±0.03008   | 0.1477±0.02886   | 0.2442±0.04564  | 0.2839±0.05642 | 0.2853±0.06142 |
| 24                                                                                            | Temporal pole              | 0.3374±0.06953 | 0.252±0.06244  | 0.2046±0.0486    | 0.1732±0.03477   | 0.143±0.02987    | 0.2444±0.05361  | 0.3052±0.07984 | 0.3003±0.07335 |
| 25                                                                                            | Parahippocampal            | 0.2913±0.05749 | 0.192±0.03799  | 0.1455±0.01961   | 0.1266±0.01905   | 0.1086±0.01845   | 0.167±0.02443   | 0.1936±0.02066 | 0.1936±0.02091 |
| 26                                                                                            | Insula                     | 0.3808±0.05685 | 0.2648±0.03606 | 0.2082±0.02442   | 0.1774±0.0183    | 0.1555±0.02039   | 0.2568±0.02525  | 0.3028±0.03278 | 0.3158±0.03693 |
| 27                                                                                            | Lateral occipital          | 0.1969±0.03237 | 0.1251±0.01119 | 0.1016±0.008153  | 0.08696±0.008086 | 0.07763±0.007071 | 0.1489±0.0266   | 0.1594±0.02523 | 0.1505±0.02395 |
| 28                                                                                            | Lingual                    | 0.2352±0.03415 | 0.1624±0.01964 | 0.1348±0.01657   | 0.1168±0.01676   | 0.103±0.01289    | 0.2157±0.03783  | 0.2265±0.04672 | 0.2282±0.0414  |
| 29                                                                                            | Cuneus                     | 0.2169±0.04204 | 0.1433±0.01586 | 0.122±0.01576    | 0.1037±0.0135    | 0.09455±0.01412  | 0.1791±0.03972  | 0.189±0.03014  | 0.1797±0.02911 |
| 30                                                                                            | Pericalcarine              | 0.2432±0.03715 | 0.1708±0.02007 | 0.1444±0.02321   | 0.1285±0.02209   | 0.1181±0.02442   | 0.2444±0.05763  | 0.2452±0.0581  | 0.2351±0.04442 |
| 31                                                                                            | Rostral anterior cingulate | 0.3113±0.07176 | 0.1987±0.04196 | 0.1517±0.03522   | 0.1219±0.02441   | 0.1028±0.01943   | 0.1596±0.03249  | 0.1675±0.03063 | 0.1692±0.02938 |
| 32                                                                                            | Caudal anterior cingulate  | 0.2847±0.05613 | 0.1869±0.0353  | 0.1376±0.01828   | 0.1121±0.01195   | 0.09756±0.01809  | 0.1487±0.02033  | 0.1574±0.02267 | 0.1572±0.02259 |
| 33                                                                                            | Posterior cingulate        | 0.3±0.04635    | 0.1798±0.03109 | 0.1306±0.01324   | 0.1064±0.01108   | 0.09014±0.01407  | 0.1452±0.02111  | 0.1552±0.0195  | 0.1604±0.01883 |
| 34                                                                                            | Isthmus cingulate          | 0.3189±0.07067 | 0.2002±0.03621 | 0.1539±0.02359   | 0.127±0.01811    | 0.1099±0.02011   | 0.1734±0.02555  | 0.1886±0.0248  | 0.1925±0.02475 |
| 35                                                                                            | Whole brain                | 0.2471±0.04139 | 0.1578±0.02556 | 0.1229±0.01523   | 0.1033±0.01237   | 0.08925±0.01333  | 0.1493±0.02013  | 0.1647±0.02477 | 0.165±0.02452  |

**Supplementary Table 1. Gray–white surface displacement.** The group mean and standard deviation of the mean absolute displacement of the gray–white surface estimated from the images from the single-repetition data, 2- to 5-repetition averaged data and the single-repetition data denoised by DnCNN, BM4D and AONLM compared to the images from the 6-repetition averaged data across 30 image volumes from the 5 evaluation subjects, calculated for 34 cortical parcels (left and right hemispheres combined) from the Desikan-Killiany Atlas provided by FreeSurfer and for the whole brain.



| Gray-CSF surface displacement (mm) compared to ground truth from 6-repetition averaged data |                            |                |                  |                  |                  |                  |                 |                 |                |
|---------------------------------------------------------------------------------------------|----------------------------|----------------|------------------|------------------|------------------|------------------|-----------------|-----------------|----------------|
| #                                                                                           | Cortices                   | 1 repetition   | 2 repetitions    | 3 repetitions    | 4 repetitions    | 5 repetitions    | 1 rep + DnCNN   | 1 rep + BM4D    | 1 rep + AONLM  |
| 1                                                                                           | Superior frontal           | 0.1913±0.04444 | 0.1207±0.02437   | 0.09649±0.01568  | 0.08558±0.01537  | 0.07352±0.01393  | 0.1232±0.02731  | 0.1534±0.04332  | 0.1388±0.03301 |
| 2                                                                                           | Rostral middle frontal     | 0.1946±0.05661 | 0.1198±0.03456   | 0.09838±0.02835  | 0.08698±0.02634  | 0.07622±0.02587  | 0.1366±0.04473  | 0.1823±0.07096  | 0.1579±0.05555 |
| 3                                                                                           | Caudal middle frontal      | 0.1603±0.0349  | 0.09986±0.0206   | 0.07789±0.01208  | 0.06847±0.01274  | 0.06001±0.01312  | 0.1036±0.0233   | 0.1189±0.03143  | 0.1102±0.02552 |
| 4                                                                                           | Pars opercularis           | 0.1654±0.03633 | 0.1043±0.01871   | 0.08358±0.01365  | 0.07083±0.0108   | 0.05961±0.01147  | 0.1116±0.02648  | 0.1262±0.02771  | 0.1194±0.02401 |
| 5                                                                                           | Pars triangularis          | 0.1698±0.05536 | 0.1046±0.02718   | 0.08333±0.02012  | 0.07253±0.01886  | 0.06245±0.02091  | 0.1116±0.03349  | 0.145±0.05354   | 0.1283±0.03999 |
| 6                                                                                           | Pars orbitalis             | 0.1882±0.06619 | 0.1172±0.04062   | 0.09308±0.0301   | 0.08197±0.02991  | 0.07138±0.02999  | 0.1346±0.04962  | 0.1732±0.06938  | 0.1527±0.05666 |
| 7                                                                                           | Lateral orbitofrontal      | 0.2512±0.04223 | 0.1719±0.03047   | 0.1382±0.02319   | 0.1216±0.01951   | 0.09782±0.01619  | 0.1873±0.04114  | 0.2231±0.0538   | 0.2089±0.04156 |
| 8                                                                                           | Medial orbitofrontal       | 0.2684±0.05152 | 0.1853±0.02753   | 0.158±0.03127    | 0.1378±0.02747   | 0.1139±0.02364   | 0.2077±0.04553  | 0.236±0.06363   | 0.2208±0.04691 |
| 9                                                                                           | Precentral                 | 0.1532±0.02725 | 0.0992±0.01726   | 0.08069±0.01505  | 0.06877±0.01283  | 0.05789±0.009577 | 0.0967±0.01662  | 0.1067±0.02339  | 0.1011±0.01729 |
| 10                                                                                          | Paracentral                | 0.1569±0.0348  | 0.09981±0.02037  | 0.07765±0.01613  | 0.06533±0.01382  | 0.0554±0.01059   | 0.1021±0.01956  | 0.1117±0.02158  | 0.1086±0.02198 |
| 11                                                                                          | Frontal pole               | 0.2384±0.07801 | 0.1562±0.04237   | 0.1487±0.05193   | 0.1229±0.04512   | 0.1192±0.0386    | 0.1739±0.05222  | 0.241±0.08651   | 0.2052±0.06352 |
| 12                                                                                          | Superior parietal          | 0.1539±0.03881 | 0.09713±0.01508  | 0.07764±0.01368  | 0.06789±0.01127  | 0.05969±0.0107   | 0.09971±0.02567 | 0.1141±0.03445  | 0.1054±0.03025 |
| 13                                                                                          | Inferior parietal          | 0.1563±0.03094 | 0.09765±0.01115  | 0.07842±0.008508 | 0.06813±0.008158 | 0.06141±0.01181  | 0.1092±0.02103  | 0.1266±0.03087  | 0.1167±0.02781 |
| 14                                                                                          | Supramarginal              | 0.1674±0.04344 | 0.1096±0.02416   | 0.0874±0.01404   | 0.07738±0.01405  | 0.06672±0.01428  | 0.1149±0.02314  | 0.1317±0.03241  | 0.1213±0.0244  |
| 15                                                                                          | Postcentral                | 0.1295±0.02017 | 0.08505±0.01062  | 0.06702±0.008854 | 0.05779±0.006189 | 0.04923±0.006239 | 0.0866±0.01395  | 0.09757±0.01998 | 0.0916±0.01596 |
| 16                                                                                          | Precuneus                  | 0.1673±0.0326  | 0.1061±0.01546   | 0.08349±0.01133  | 0.07014±0.008038 | 0.06049±0.008582 | 0.1117±0.02195  | 0.1274±0.02823  | 0.121±0.02483  |
| 17                                                                                          | Superior temporal          | 0.2206±0.04574 | 0.1575±0.03521   | 0.124±0.02138    | 0.1113±0.02306   | 0.09833±0.02499  | 0.154±0.02904   | 0.1686±0.03683  | 0.1603±0.03431 |
| 18                                                                                          | Middle temporal            | 0.2326±0.05577 | 0.1587±0.04203   | 0.123±0.02847    | 0.1076±0.02311   | 0.09471±0.03011  | 0.1631±0.0419   | 0.1797±0.04698  | 0.1687±0.04635 |
| 19                                                                                          | Inferior temporal          | 0.2876±0.06326 | 0.1966±0.05414   | 0.1547±0.02971   | 0.1363±0.03134   | 0.1107±0.02741   | 0.2037±0.05935  | 0.2129±0.04838  | 0.2025±0.04408 |
| 20                                                                                          | Banks of sup temp sulcus   | 0.1831±0.03068 | 0.125±0.04315    | 0.09274±0.00744  | 0.0782±0.006199  | 0.0654±0.007666  | 0.1273±0.01958  | 0.1462±0.02918  | 0.1357±0.02035 |
| 21                                                                                          | Fusiform                   | 0.2506±0.0492  | 0.1701±0.0397    | 0.1339±0.02693   | 0.114±0.02388    | 0.09615±0.02407  | 0.1708±0.03484  | 0.1823±0.03444  | 0.1799±0.03402 |
| 22                                                                                          | Transverse temporal        | 0.2191±0.05948 | 0.1489±0.04053   | 0.1261±0.03432   | 0.1043±0.03193   | 0.0918±0.02803   | 0.1584±0.04886  | 0.156±0.03833   | 0.1571±0.0416  |
| 23                                                                                          | Entorhinal                 | 0.4437±0.105   | 0.3581±0.2666    | 0.2517±0.06709   | 0.2154±0.03797   | 0.1911±0.06227   | 0.2847±0.0437   | 0.2902±0.05204  | 0.2949±0.05644 |
| 24                                                                                          | Temporal pole              | 0.4115±0.12    | 0.3316±0.1551    | 0.249±0.06562    | 0.218±0.0629     | 0.1839±0.06022   | 0.2745±0.0688   | 0.2658±0.04893  | 0.2574±0.04887 |
| 25                                                                                          | Parahippocampal            | 0.272±0.06648  | 0.1813±0.04378   | 0.1419±0.0317    | 0.1236±0.03232   | 0.1011±0.02358   | 0.1844±0.0388   | 0.1968±0.04689  | 0.1984±0.03872 |
| 26                                                                                          | Insula                     | 0.2739±0.03667 | 0.1973±0.01806   | 0.1655±0.01239   | 0.1438±0.00929   | 0.1282±0.01066   | 0.1957±0.01948  | 0.2071±0.0182   | 0.2103±0.01481 |
| 27                                                                                          | Lateral occipital          | 0.1537±0.02931 | 0.09403±0.007145 | 0.07442±0.005717 | 0.06486±0.005007 | 0.05775±0.006145 | 0.1083±0.02076  | 0.1158±0.02207  | 0.1107±0.02149 |
| 28                                                                                          | Lingual                    | 0.2011±0.0361  | 0.1272±0.01691   | 0.1059±0.01661   | 0.09029±0.01223  | 0.0802±0.01274   | 0.1535±0.02342  | 0.1539±0.02951  | 0.157±0.0286   |
| 29                                                                                          | Cuneus                     | 0.1422±0.02873 | 0.08665±0.009383 | 0.07162±0.01121  | 0.06233±0.007152 | 0.05506±0.008055 | 0.09928±0.01603 | 0.1052±0.01768  | 0.1026±0.01884 |
| 30                                                                                          | Pericalcarine              | 0.1571±0.03294 | 0.1017±0.0154    | 0.08431±0.01782  | 0.07493±0.01652  | 0.06826±0.02038  | 0.1142±0.02938  | 0.1173±0.0313   | 0.1173±0.02879 |
| 31                                                                                          | Rostral anterior cingulate | 0.2588±0.04309 | 0.1835±0.03033   | 0.1482±0.02499   | 0.1292±0.02689   | 0.1072±0.02067   | 0.1833±0.03949  | 0.2113±0.04781  | 0.1896±0.03269 |
| 32                                                                                          | Caudal anterior cingulate  | 0.2473±0.04066 | 0.1752±0.01942   | 0.1427±0.01366   | 0.123±0.01032    | 0.1019±0.01064   | 0.1714±0.02416  | 0.1834±0.02819  | 0.1744±0.0237  |
| 33                                                                                          | Posterior cingulate        | 0.2285±0.03216 | 0.1566±0.01709   | 0.125±0.01029    | 0.1058±0.007343  | 0.08979±0.009166 | 0.156±0.01967   | 0.1707±0.02255  | 0.1653±0.0211  |
| 34                                                                                          | Isthmus cingulate          | 0.2518±0.03012 | 0.1746±0.0155    | 0.143±0.008907   | 0.1211±0.006963  | 0.1019±0.007722  | 0.1706±0.02017  | 0.1795±0.01711  | 0.1768±0.01901 |
| 35                                                                                          | Whole brain                | 0.1935±0.03284 | 0.1275±0.01984   | 0.1021±0.01357   | 0.08884±0.01161  | 0.07636±0.01214  | 0.1337±0.02316  | 0.1517±0.03209  | 0.1423±0.02613 |

**Supplementary Table 2. Gray–CSF surface displacement.** The group mean and standard deviation of the mean absolute displacement of the gray–CSF surface estimated from the images from the single-repetition data, 2- to 5-repetition averaged data and the single-repetition data denoised by DnCNN, BM4D and AONLM compared to the images from the 6-repetition averaged data across 30 image volumes from the 5 evaluation subjects, calculated for 34 cortical parcels (left and right hemispheres combined) from the Desikan-Killiany Atlas provided by FreeSurfer and for the whole brain.

| Cortical thickness difference (mm) compared to ground truth from 6-repetition averaged data |                            |                |                  |                  |                  |                  |                |                |                |
|---------------------------------------------------------------------------------------------|----------------------------|----------------|------------------|------------------|------------------|------------------|----------------|----------------|----------------|
| #                                                                                           | Cortices                   | 1 repetition   | 2 repetitions    | 3 repetitions    | 4 repetitions    | 5 repetitions    | 1 rep + DnCNN  | 1 rep + BM4D   | 1 rep + AONLM  |
| 1                                                                                           | Superior frontal           | 0.1853±0.03055 | 0.1186±0.02105   | 0.09382±0.01344  | 0.08042±0.01117  | 0.06817±0.01079  | 0.1214±0.02253 | 0.1499±0.03158 | 0.1373±0.02657 |
| 2                                                                                           | Rostral middle frontal     | 0.1631±0.04248 | 0.1009±0.02796   | 0.08117±0.02128  | 0.06981±0.01771  | 0.05943±0.01533  | 0.1121±0.03357 | 0.1384±0.04659 | 0.1253±0.03917 |
| 3                                                                                           | Caudal middle frontal      | 0.1748±0.03459 | 0.1116±0.02328   | 0.08574±0.01335  | 0.07274±0.01203  | 0.06092±0.01087  | 0.1112±0.02092 | 0.1303±0.02641 | 0.1239±0.02395 |
| 4                                                                                           | Pars opercularis           | 0.1714±0.0379  | 0.1063±0.02142   | 0.08087±0.01459  | 0.06865±0.0119   | 0.05729±0.009922 | 0.107±0.02624  | 0.1203±0.02687 | 0.116±0.02429  |
| 5                                                                                           | Pars triangularis          | 0.172±0.06022  | 0.1079±0.0393    | 0.08104±0.02311  | 0.06843±0.01959  | 0.05813±0.01807  | 0.1077±0.03285 | 0.1289±0.04786 | 0.1196±0.03938 |
| 6                                                                                           | Pars orbitalis             | 0.1683±0.04852 | 0.1111±0.03545   | 0.0875±0.0284    | 0.07326±0.02176  | 0.06187±0.01856  | 0.1207±0.03792 | 0.1425±0.05234 | 0.1306±0.0429  |
| 7                                                                                           | Lateral orbitofrontal      | 0.203±0.03651  | 0.141±0.02708    | 0.112±0.01909    | 0.09671±0.01592  | 0.0787±0.01252   | 0.1514±0.03095 | 0.1775±0.04205 | 0.1705±0.03593 |
| 8                                                                                           | Medial orbitofrontal       | 0.2003±0.03826 | 0.1416±0.02494   | 0.121±0.02194    | 0.1031±0.0182    | 0.08639±0.01666  | 0.1628±0.03482 | 0.18±0.04679   | 0.1752±0.03646 |
| 9                                                                                           | Precentral                 | 0.1922±0.03063 | 0.1264±0.01884   | 0.1014±0.01442   | 0.08396±0.011    | 0.07186±0.01153  | 0.1325±0.02406 | 0.1493±0.03568 | 0.1528±0.03431 |
| 10                                                                                          | Paracentral                | 0.1986±0.0269  | 0.1295±0.01957   | 0.1025±0.01324   | 0.08482±0.01074  | 0.07088±0.01206  | 0.1395±0.02098 | 0.1539±0.03789 | 0.1625±0.03939 |
| 11                                                                                          | Frontal pole               | 0.1861±0.05158 | 0.1253±0.03208   | 0.1114±0.03126   | 0.09341±0.02309  | 0.08576±0.01941  | 0.1496±0.04203 | 0.1839±0.06527 | 0.1615±0.04754 |
| 12                                                                                          | Superior parietal          | 0.1491±0.02225 | 0.09529±0.01024  | 0.07489±0.006546 | 0.06361±0.004999 | 0.05417±0.005375 | 0.1041±0.02195 | 0.1183±0.02581 | 0.1142±0.02263 |
| 13                                                                                          | Inferior parietal          | 0.1397±0.02422 | 0.08831±0.009968 | 0.07041±0.005213 | 0.06014±0.005024 | 0.05274±0.005975 | 0.0965±0.01778 | 0.1119±0.02005 | 0.1066±0.02054 |
| 14                                                                                          | Supramarginal              | 0.1485±0.03003 | 0.09654±0.01706  | 0.07699±0.01058  | 0.0663±0.008693  | 0.05666±0.008479 | 0.1019±0.01817 | 0.1159±0.0227  | 0.1096±0.01876 |
| 15                                                                                          | Postcentral                | 0.1665±0.02588 | 0.1092±0.01778   | 0.08545±0.01273  | 0.07156±0.01021  | 0.05974±0.009252 | 0.1175±0.02093 | 0.1335±0.02838 | 0.1337±0.02467 |
| 16                                                                                          | Precuneus                  | 0.1488±0.02005 | 0.09779±0.01061  | 0.07796±0.007576 | 0.06417±0.005039 | 0.05462±0.005488 | 0.1044±0.01512 | 0.1199±0.01846 | 0.119±0.01758  |
| 17                                                                                          | Superior temporal          | 0.1912±0.02614 | 0.133±0.02027    | 0.1047±0.01179   | 0.09284±0.01161  | 0.07931±0.01318  | 0.1332±0.01916 | 0.1487±0.02502 | 0.1425±0.02208 |
| 18                                                                                          | Middle temporal            | 0.1845±0.03134 | 0.1273±0.02497   | 0.1014±0.01732   | 0.08789±0.01388  | 0.07544±0.01631  | 0.1346±0.02815 | 0.1538±0.03099 | 0.1462±0.02955 |
| 19                                                                                          | Inferior temporal          | 0.2074±0.04201 | 0.1461±0.03331   | 0.1166±0.01991   | 0.1016±0.02024   | 0.08295±0.01691  | 0.1599±0.04164 | 0.1738±0.03635 | 0.1646±0.03358 |
| 20                                                                                          | Banks of sup temp sulcus   | 0.155±0.02527  | 0.1023±0.0263    | 0.0763±0.00614   | 0.06423±0.004637 | 0.0536±0.005343  | 0.1055±0.01555 | 0.1218±0.02029 | 0.1139±0.01642 |
| 21                                                                                          | Fusiform                   | 0.1926±0.03602 | 0.136±0.02807    | 0.1069±0.01987   | 0.09074±0.01791  | 0.07546±0.01684  | 0.1387±0.02418 | 0.1572±0.0279  | 0.155±0.02842  |
| 22                                                                                          | Transverse temporal        | 0.2331±0.0421  | 0.1492±0.03417   | 0.1154±0.02583   | 0.0932±0.02032   | 0.08142±0.01675  | 0.1483±0.02395 | 0.154±0.02554  | 0.1657±0.02443 |
| 23                                                                                          | Entorhinal                 | 0.3209±0.07421 | 0.2632±0.1661    | 0.1881±0.05271   | 0.1585±0.02637   | 0.1416±0.03688   | 0.2265±0.04005 | 0.2367±0.05287 | 0.2367±0.05558 |
| 24                                                                                          | Temporal pole              | 0.2957±0.08222 | 0.2418±0.1101    | 0.1869±0.04348   | 0.1599±0.03715   | 0.1379±0.03905   | 0.2201±0.05038 | 0.2372±0.05409 | 0.2288±0.05605 |
| 25                                                                                          | Parahippocampal            | 0.2255±0.03986 | 0.1611±0.03048   | 0.1259±0.02137   | 0.1108±0.02247   | 0.09077±0.0186   | 0.1687±0.03112 | 0.1859±0.03972 | 0.1829±0.03407 |
| 26                                                                                          | Insula                     | 0.242±0.0318   | 0.1763±0.01763   | 0.1456±0.01314   | 0.126±0.01032    | 0.1136±0.01147   | 0.182±0.01983  | 0.2041±0.02418 | 0.2057±0.02263 |
| 27                                                                                          | Lateral occipital          | 0.1447±0.02396 | 0.09005±0.006984 | 0.07283±0.003932 | 0.06242±0.003198 | 0.05505±0.00378  | 0.1089±0.01737 | 0.1212±0.01866 | 0.1153±0.01893 |
| 28                                                                                          | Lingual                    | 0.1703±0.02699 | 0.1165±0.01274   | 0.09657±0.01102  | 0.08212±0.008749 | 0.07114±0.007885 | 0.1557±0.02316 | 0.1648±0.03295 | 0.166±0.0262   |
| 29                                                                                          | Cuneus                     | 0.1442±0.02413 | 0.09269±0.00823  | 0.07796±0.00646  | 0.06602±0.005539 | 0.05728±0.005062 | 0.118±0.02291  | 0.1261±0.01881 | 0.1222±0.02001 |
| 30                                                                                          | Pericalcarine              | 0.1617±0.02855 | 0.1107±0.01377   | 0.09247±0.01198  | 0.08154±0.01136  | 0.07259±0.01324  | 0.1669±0.04166 | 0.1619±0.04207 | 0.1551±0.03643 |
| 31                                                                                          | Rostral anterior cingulate | 0.214±0.03345  | 0.1449±0.02209   | 0.1152±0.01989   | 0.09787±0.01866  | 0.08315±0.01403  | 0.146±0.03294  | 0.1647±0.03866 | 0.1539±0.03146 |
| 32                                                                                          | Caudal anterior cingulate  | 0.1982±0.02901 | 0.1408±0.01927   | 0.1143±0.01261   | 0.097±0.009672   | 0.08374±0.01348  | 0.1422±0.01745 | 0.1507±0.02224 | 0.1455±0.02152 |
| 33                                                                                          | Posterior cingulate        | 0.1947±0.02562 | 0.1313±0.01813   | 0.1034±0.01065   | 0.08557±0.007924 | 0.0729±0.008893  | 0.1345±0.0187  | 0.1433±0.02052 | 0.1449±0.02004 |
| 34                                                                                          | Isthmus cingulate          | 0.2176±0.03474 | 0.1465±0.01827   | 0.1189±0.01218   | 0.1007±0.009819  | 0.08355±0.01006  | 0.1493±0.01937 | 0.1559±0.01735 | 0.1571±0.02014 |
| 35                                                                                          | Whole brain                | 0.1761±0.02746 | 0.1171±0.01801   | 0.09334±0.01196  | 0.07959±0.009615 | 0.06773±0.00934  | 0.1261±0.02026 | 0.1434±0.02681 | 0.1383±0.02349 |

**Supplementary Table 3. Cortical thickness difference.** The group mean and standard deviation of the mean absolute difference of the cortical thickness estimated from the images from the single-repetition data, 2- to 5-repetition averaged data and the single-repetition data denoised by DnCNN, BM4D and AONLM compared to the images from the 6-repetition averaged data across 30 image volumes from the 5 evaluation subjects, calculated for 34 cortical parcels (left and right hemispheres combined) from the Desikan-Killiany Atlas provided by FreeSurfer and for the whole brain.

| #  | Cortices                   | Scan-rescan precision                |                |                |                                    |                |                |                                    |                |                |
|----|----------------------------|--------------------------------------|----------------|----------------|------------------------------------|----------------|----------------|------------------------------------|----------------|----------------|
|    |                            | Gray-white surface displacement (mm) |                |                | Gray-CSF surface displacement (mm) |                |                | Cortical thickness difference (mm) |                |                |
|    |                            | 1 rep + DnCNN                        | 1 rep + BM4D   | 1 rep + AONLM  | 1 rep + DnCNN                      | 1 rep + BM4D   | 1 rep + AONLM  | 1 rep + DnCNN                      | 1 rep + BM4D   | 1 rep + AONLM  |
| 1  | Superior frontal           | 0.157±0.04002                        | 0.159±0.04046  | 0.1659±0.04202 | 0.1518±0.04321                     | 0.1703±0.04732 | 0.1665±0.0444  | 0.1452±0.03596                     | 0.1608±0.03906 | 0.1595±0.03903 |
| 2  | Rostral middle frontal     | 0.1425±0.05495                       | 0.1592±0.05791 | 0.1621±0.05646 | 0.18±0.08167                       | 0.2153±0.08891 | 0.2081±0.08159 | 0.1394±0.05284                     | 0.1608±0.05442 | 0.1608±0.05269 |
| 3  | Caudal middle frontal      | 0.147±0.03577                        | 0.15±0.03873   | 0.1586±0.04249 | 0.1298±0.03596                     | 0.138±0.04208  | 0.1403±0.03943 | 0.133±0.03158                      | 0.1426±0.0358  | 0.1463±0.03562 |
| 4  | Pars opercularis           | 0.1382±0.03913                       | 0.1371±0.03691 | 0.1446±0.03969 | 0.1426±0.03819                     | 0.143±0.03684  | 0.1445±0.03545 | 0.1339±0.03394                     | 0.1376±0.03359 | 0.1405±0.03507 |
| 5  | Pars triangularis          | 0.1403±0.05566                       | 0.1504±0.06056 | 0.1524±0.05812 | 0.1505±0.05755                     | 0.1657±0.06702 | 0.1635±0.06425 | 0.1323±0.0489                      | 0.1451±0.05364 | 0.1473±0.05508 |
| 6  | Pars orbitalis             | 0.1749±0.07372                       | 0.1893±0.07797 | 0.1894±0.07512 | 0.188±0.09946                      | 0.2115±0.09887 | 0.2058±0.099   | 0.1546±0.0669                      | 0.1748±0.06852 | 0.175±0.0693   |
| 7  | Lateral orbitofrontal      | 0.1937±0.0651                        | 0.1964±0.0644  | 0.2015±0.06355 | 0.2553±0.09246                     | 0.2681±0.09147 | 0.2669±0.08636 | 0.1949±0.05837                     | 0.2052±0.05872 | 0.2077±0.05615 |
| 8  | Medial orbitofrontal       | 0.1877±0.05595                       | 0.1887±0.05701 | 0.1953±0.05423 | 0.2737±0.09121                     | 0.2817±0.09183 | 0.2814±0.08638 | 0.206±0.05959                      | 0.2134±0.06522 | 0.2158±0.05669 |
| 9  | Precentral                 | 0.2019±0.04555                       | 0.1941±0.04627 | 0.2064±0.04806 | 0.119±0.02472                      | 0.1164±0.0256  | 0.1203±0.02376 | 0.1599±0.03272                     | 0.1592±0.03615 | 0.1689±0.03603 |
| 10 | Paracentral                | 0.2125±0.03338                       | 0.1972±0.03643 | 0.2208±0.04084 | 0.1288±0.02507                     | 0.1211±0.02566 | 0.1269±0.02685 | 0.1713±0.02595                     | 0.1665±0.03158 | 0.1825±0.03496 |
| 11 | Frontal pole               | 0.2133±0.1181                        | 0.2412±0.1165  | 0.2415±0.1251  | 0.2369±0.1384                      | 0.2956±0.117   | 0.2827±0.1149  | 0.1784±0.07987                     | 0.214±0.08191  | 0.2148±0.07765 |
| 12 | Superior parietal          | 0.138±0.01979                        | 0.1364±0.02123 | 0.1449±0.02286 | 0.1192±0.03514                     | 0.1255±0.03961 | 0.1258±0.03965 | 0.1238±0.02437                     | 0.1296±0.02686 | 0.1337±0.02628 |
| 13 | Inferior parietal          | 0.1191±0.01762                       | 0.1263±0.02141 | 0.1311±0.02203 | 0.1277±0.0292                      | 0.1397±0.03787 | 0.1389±0.0334  | 0.114±0.01778                      | 0.1266±0.02381 | 0.1272±0.02193 |
| 14 | Supramarginal              | 0.1285±0.02556                       | 0.1316±0.02738 | 0.1374±0.02837 | 0.1387±0.0382                      | 0.147±0.04231  | 0.1424±0.03633 | 0.1223±0.02435                     | 0.1325±0.02711 | 0.131±0.02619  |
| 15 | Postcentral                | 0.178±0.0376                         | 0.1724±0.03859 | 0.1853±0.03925 | 0.1098±0.02188                     | 0.1094±0.02426 | 0.1118±0.02179 | 0.1435±0.0263                      | 0.1437±0.02952 | 0.1514±0.02882 |
| 16 | Precuneus                  | 0.1399±0.01962                       | 0.1377±0.0201  | 0.1452±0.02017 | 0.1392±0.02875                     | 0.137±0.03378  | 0.1379±0.03176 | 0.1321±0.01891                     | 0.1345±0.02144 | 0.1376±0.02212 |
| 17 | Superior temporal          | 0.1646±0.02638                       | 0.1581±0.02687 | 0.1671±0.03005 | 0.1856±0.04356                     | 0.183±0.04722  | 0.1851±0.04347 | 0.1588±0.02904                     | 0.1662±0.03557 | 0.1673±0.03314 |
| 18 | Middle temporal            | 0.148±0.02896                        | 0.1503±0.0298  | 0.1564±0.03065 | 0.1902±0.0642                      | 0.2059±0.07408 | 0.1996±0.072   | 0.1608±0.03892                     | 0.1791±0.04963 | 0.1742±0.04722 |
| 19 | Inferior temporal          | 0.1779±0.04484                       | 0.1708±0.0389  | 0.1786±0.04239 | 0.2528±0.08932                     | 0.2593±0.09676 | 0.253±0.0968   | 0.1951±0.05706                     | 0.2092±0.0642  | 0.2027±0.06386 |
| 20 | Banks of sup temp sulcus   | 0.1115±0.01632                       | 0.1165±0.0205  | 0.1211±0.01895 | 0.1571±0.02971                     | 0.1636±0.0388  | 0.1589±0.02817 | 0.1313±0.01807                     | 0.1418±0.0248  | 0.1381±0.01861 |
| 21 | Fusiform                   | 0.1705±0.03561                       | 0.1617±0.0289  | 0.1715±0.03161 | 0.2182±0.06523                     | 0.207±0.06214  | 0.2095±0.06291 | 0.1772±0.04459                     | 0.1801±0.04654 | 0.1799±0.04528 |
| 22 | Transverse temporal        | 0.2239±0.04902                       | 0.2251±0.06411 | 0.2557±0.0556  | 0.1767±0.04511                     | 0.1559±0.04721 | 0.1594±0.03628 | 0.1743±0.02977                     | 0.1789±0.03816 | 0.1966±0.03589 |
| 23 | Entorhinal                 | 0.3109±0.07561                       | 0.284±0.05143  | 0.2988±0.05291 | 0.3575±0.09264                     | 0.3187±0.1033  | 0.3445±0.1153  | 0.2805±0.07655                     | 0.2742±0.07404 | 0.2781±0.08825 |
| 24 | Temporal pole              | 0.3031±0.09927                       | 0.2907±0.1182  | 0.3064±0.1129  | 0.3292±0.1547                      | 0.3054±0.1297  | 0.3276±0.1617  | 0.2688±0.1027                      | 0.2647±0.1076  | 0.2886±0.1264  |
| 25 | Parahippocampal            | 0.1944±0.03907                       | 0.1615±0.02378 | 0.1791±0.02739 | 0.2344±0.0733                      | 0.2121±0.06963 | 0.2259±0.07579 | 0.2095±0.05711                     | 0.1997±0.05964 | 0.2081±0.06089 |
| 26 | Insula                     | 0.2779±0.05112                       | 0.2631±0.04618 | 0.261±0.04645  | 0.232±0.03522                      | 0.2065±0.02563 | 0.2061±0.02456 | 0.2103±0.03394                     | 0.2022±0.03098 | 0.1987±0.02966 |
| 27 | Lateral occipital          | 0.1511±0.02218                       | 0.1621±0.02349 | 0.1639±0.02562 | 0.1233±0.02559                     | 0.1264±0.02715 | 0.1288±0.02704 | 0.1248±0.01818                     | 0.1349±0.02073 | 0.136±0.02157  |
| 28 | Lingual                    | 0.2055±0.02287                       | 0.2136±0.02852 | 0.2243±0.03003 | 0.1664±0.02971                     | 0.1559±0.02905 | 0.1641±0.0291  | 0.1681±0.02101                     | 0.1742±0.02509 | 0.1803±0.02616 |
| 29 | Cuneus                     | 0.1719±0.02902                       | 0.1855±0.03175 | 0.1874±0.03012 | 0.1098±0.02337                     | 0.1108±0.02402 | 0.1148±0.02367 | 0.1286±0.01702                     | 0.1395±0.02138 | 0.1403±0.01902 |
| 30 | Pericalcarine              | 0.211±0.03117                        | 0.2216±0.03522 | 0.2279±0.03896 | 0.1248±0.03283                     | 0.1261±0.02955 | 0.1327±0.03491 | 0.1608±0.02608                     | 0.1642±0.03376 | 0.1671±0.03185 |
| 31 | Rostral anterior cingulate | 0.1819±0.05255                       | 0.1788±0.04467 | 0.1798±0.04353 | 0.2347±0.08022                     | 0.2372±0.06655 | 0.2279±0.0626  | 0.1797±0.05297                     | 0.1857±0.04439 | 0.1798±0.0465  |
| 32 | Caudal anterior cingulate  | 0.1698±0.03529                       | 0.1666±0.03504 | 0.172±0.03783  | 0.2103±0.03663                     | 0.1981±0.03693 | 0.2012±0.03323 | 0.1702±0.02681                     | 0.1711±0.03071 | 0.171±0.0303   |
| 33 | Posterior cingulate        | 0.172±0.02972                        | 0.161±0.02872  | 0.1705±0.03047 | 0.194±0.03335                      | 0.1801±0.03517 | 0.1854±0.03289 | 0.1661±0.0294                      | 0.1651±0.03293 | 0.1655±0.03138 |
| 34 | Isthmus cingulate          | 0.1944±0.03594                       | 0.1684±0.02745 | 0.1797±0.02981 | 0.1979±0.02761                     | 0.174±0.02661  | 0.1855±0.02794 | 0.173±0.02684                      | 0.1544±0.02564 | 0.1615±0.02692 |
| 35 | Whole brain                | 0.1649±0.03371                       | 0.1654±0.0336  | 0.1726±0.0348  | 0.1648±0.04283                     | 0.1701±0.0447  | 0.1702±0.04257 | 0.1519±0.03158                     | 0.16±0.03421   | 0.1619±0.0338  |

**Supplementary Table 4. Scan-rescan precision.** The group mean and standard deviation of the mean absolute displacement/difference of the gray–white surface, gray–CSF surface and cortical thickness estimated from two consecutively acquired 1-repetition data denoised by DnCNN, BM4D and AONLM across 25 image volumes from the 5 evaluation subjects, calculated for 34 cortical parcels (left and right hemispheres combined) from the Desikan-Killiany Atlas provided by FreeSurfer and for the whole brain.
